# Supplementary material for: Horizontal acquisition of a hypoxia-responsive molybdenum cofactor biosynthesis pathway contributed to Mycobacterium tuberculosis pathoadaptation
Source: PubMed Central journal article supplement (PMC5720804; doi:10.1371/journal.ppat.1006752), 2017-11-27

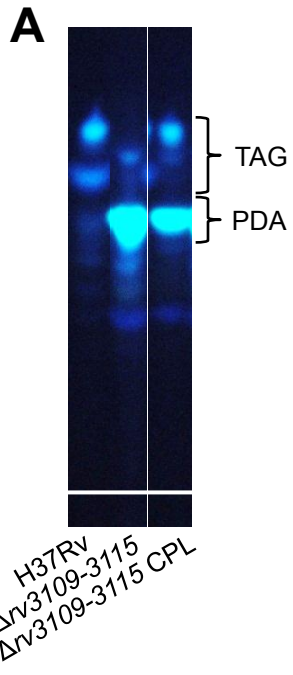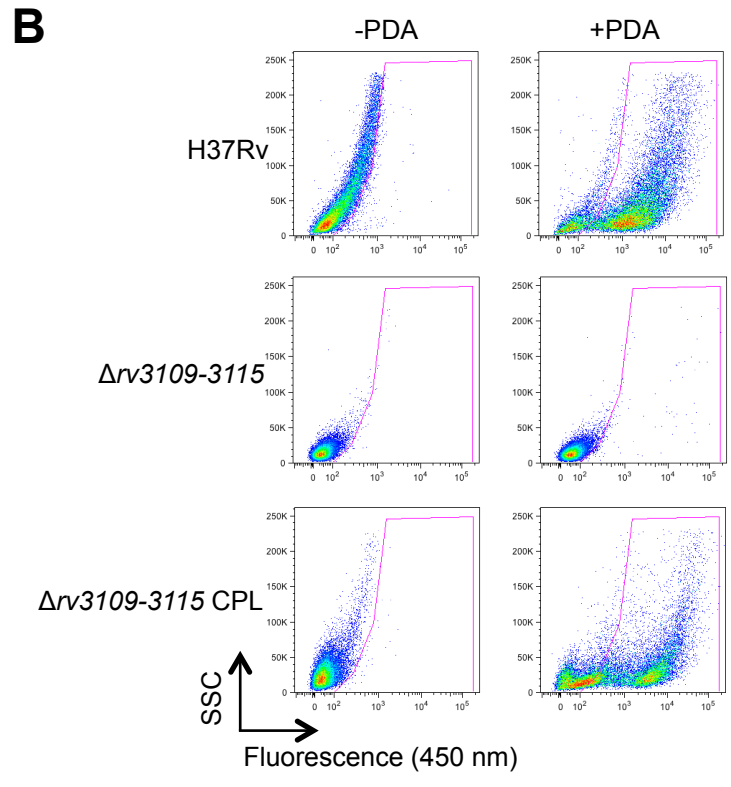

Supplement: ppat.1006752.s006.pdf [file ppat.1006752.s006.pdf]
