# Supplementary material for: Horizontal acquisition of a hypoxia-responsive molybdenum cofactor biosynthesis pathway contributed to Mycobacterium tuberculosis pathoadaptation
Source: PLOS journal article supplement (doi:10.1371/journal.ppat.1006752), 2017-11-27

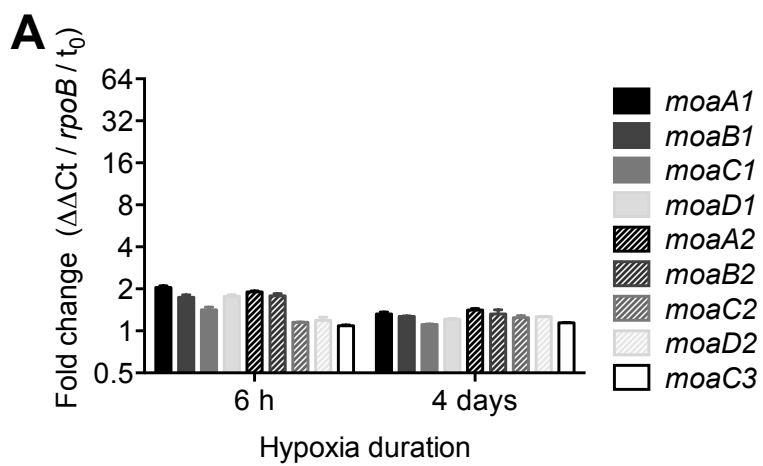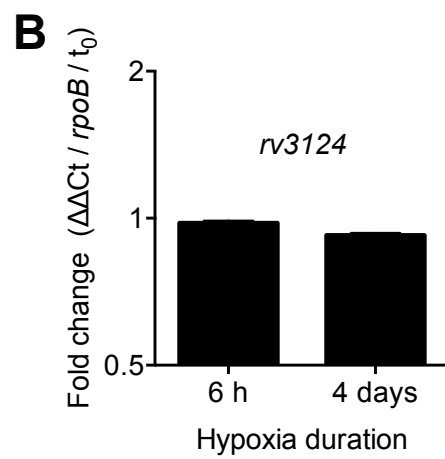

Supplement: S7 (10.1371/journal.ppat.1006752.s007) [file journal.ppat.1006752.s007]
